# Disorder-Free Data are All You Need: Inverse Supervised Learning for Broad-Spectrum Head Disorder Detection

Yuwei He<sup>1,3+</sup>, Yuchen Guo<sup>1+</sup>, Jinhao Lyu<sup>2+</sup>, Liangdi Ma<sup>1,3+</sup>, Haotian Tan<sup>1,3</sup>, Wei Zhang<sup>5</sup>, Guiguang Ding<sup>1,3</sup>, Hengrui Liang<sup>6</sup>, Jianxing He<sup>6</sup>, Xin Lou<sup>2\*</sup>, Qionghai Dai<sup>1,4\*</sup> and Feng Xu<sup>1,3\*</sup>,

<sup>1</sup>Institute for Brain and Cognitive Sciences, BNRist, Tsinghua University, Beijing, China, 100084

<sup>2</sup>Department of Radiology, Chinese PLA General Hospital, Beijing, China, 100853

<sup>3</sup>School of Software, Tsinghua University, Beijing, China, 100084

<sup>4</sup>Department of Automation, Tsinghua University, Beijing, China, 100084

<sup>5</sup>Department of Radiology, Brain Hospital of Hunan Province, Hunan, China, 410013

<sup>6</sup>China State Key Laboratory of Respiratory Disease & National Clinical Research Center for Respiratory Disease, the First Affiliated Hospital of Guangzhou Medical University, Guangzhou, China, 510120

<sup>+</sup>These authors contributed equally

<sup>\*</sup>Corresponding authors, [louxin@301hospital.com.cn](mailto:louxin@301hospital.com.cn); [daiqionghai@tsinghua.edu.cn](mailto:daiqionghai@tsinghua.edu.cn); [xufeng2003@gmail.com](mailto:xufeng2003@gmail.com)

1 **Abstract**

2 **BACKGROUND**

3 **The development of artificial intelligence (AI)-based medical systems heavily relies on the**  
4 **collection and annotation of sufficient data containing disorders. However, the preparation of**  
5 **data with complete disorder types and adequate annotations presents a significant challenge,**  
6 **limiting the diagnostic capabilities of existing AI-based medical systems. This study introduces**

7 **a novel AI-based system that accurately detects a broad spectrum of disorders without requiring**  
8 **any disorder-containing data.**

## 9 **METHODS**

10 **We obtained a training dataset of 21,429 disorder-free head computed tomography (CT) scans**  
11 **and proposed a learning algorithm called Inverse Supervised Learning (ISL). This algorithm**  
12 **learns and understands disorder-free samples instead of disorder-contained ones, enabling the**  
13 **identification of all types of disorders. We also developed a diagnosis and visualization software**  
14 **for clinical usage based on the system's ability to provide visually understandable clues.**

## 15 **RESULTS**

16 **The system achieved Area Under the Curve (AUC) values of 0.883, 0.868, and 0.866 on**  
17 **retrospective (127 disorder types, 9,967 scans), prospective (117 disorder types, 3,054 scans), and**  
18 **cross-center (46 disorder types, 554 scans) datasets, respectively. These results demonstrate that**  
19 **the system can detect far more disorder types than previous AI-based systems. Furthermore, the**  
20 **ISL-based systems achieved AUC values of 0.893 and 0.895 on pulmonary CT and retinal optical**  
21 **coherence tomography (OCT), respectively, demonstrating that ISL can generalize well to non-**  
22 **head and non-CT images.**

## 23 **CONCLUSIONS**

24 **Our novel AI-based system, utilizing ISL, can accurately and broadly detect disorders without**  
25 **requiring disorder-containing data. This system not only outperforms previous AI-based**

26 **systems in terms of disorder detection but also provides visually understandable clues,**  
27 **enhancing its clinical utility. The successful application of ISL to non-head and non-CT images**  
28 **further demonstrates its potential for broad-spectrum medical applications. (Funded by**  
29 **National Key R&D Program of China, National Natural Science Foundation of China)**

30 Over the past decade, artificial intelligence (AI) has made significant strides and has been  
31 applied in various fields. In the medical field, the accumulation of medical image data has enabled  
32 many AI diagnostic techniques to achieve radiologist-level performance in recognizing,  
33 classifying, and quantifying specific diseases. For example, AI has been used for cerebral  
34 hemorrhage recognition<sup>1</sup> and COVID-19 recognition<sup>2</sup> from CT images. These breakthroughs have  
35 led us to envision that AI diagnostic techniques can assist in clinical decision-making from medical  
36 images and alleviate the severe shortage of expert radiologists in many areas and hospitals.

37 Despite the significant progress made in AI techniques, there is still a gap between these  
38 techniques and real clinical decision-making. Current AI techniques primarily focus on  
39 recognizing specific types of disorders from input medical data. However, for a clinical decision-  
40 making workflow, the most basic and essential task is to identify all possible disorder types that  
41 could be diagnosed from the medical image. For instance, in the case of brain CT, more than one  
42 hundred types of disorders could be diagnosed from it. Therefore, a decision-making diagnostic  
43 system for brain CT must be capable of detecting a broad spectrum of disorders, as missing the  
44 detection of any disorder type is unacceptable. Existing medical AI techniques are developed based  
45 on widely-used AI paradigms, which involve deciding the disorder types to be handled, collecting

46 sufficient disorder-contained samples, and constructing recognition/localization/segmentation  
47 models for the disorders. This paradigm works well when the disorder types are limited, and the  
48 samples are easily accessible. However, developing a broad-spectrum disorder detection system  
49 using this paradigm requires collecting data and constructing models for all types of disorders,  
50 which is extremely difficult and inefficient, especially for unusual diseases. Therefore, it is  
51 impractical to use the widely-used AI paradigms to achieve real clinical decision-making.

52 To address the challenges mentioned above, we propose a novel AI solution called Inverse  
53 Supervised Learning (ISL). Instead of using disorder-contained data, which requires hundreds of  
54 disorder types and a large number of samples for each type, we use disorder-free medical images  
55 for supervision. In theory, we use the opposite problem (detecting no-disorder samples) to replace  
56 the original problem (detecting all types of disorders). Therefore, instead of training hundreds of  
57 models to recognize all possible types of disorders, we train just one model to understand the  
58 concept of disorder-free fully. Consequently, all disorders can be identified as they differ from the  
59 disorder-free samples used in training. With our paradigm, the challenges mentioned above are  
60 fully resolved as there is no need for samples of all possible disorder types.

61 To achieve ISL, we utilize the traditional computer vision task of image inpainting in a novel  
62 framework. Image inpainting aims to restore the content of a partially missing image based on the  
63 context of non-missing information. Specifically, in this case, an image inpainting network is  
64 trained to replenish masked regions in a medical image, where the replenished content always  
65 reflects healthy tissue because the training dataset contains only disorder-free medical images. If

66 any disorder exists in the image and the disorder region is masked off, the reconstructed disorder-  
67 free image would be significantly different from the original one. Conversely, for an image without  
68 disorders, no matter which region is masked, the reconstructed image should always be similar to  
69 the original one as they are both healthy and consistent with the rest of the healthy images. By  
70 masking, inpainting, and comparing all the image regions, ISL can detect various types of disorders  
71 and locate the disorder regions. Our proposed solution, ISL, (1) does not require the deliberate  
72 collection of data for any disorder type; (2) ensures that the data used to develop systems are easily  
73 accessible; (3) does not require experts to manually annotate the data; (4) enables the developed  
74 system to recognize broad-spectrum disorders rather than specific ones; and (5) provides experts  
75 with clinical clues, such as disorder locations.

76 In this study, we utilized ISL to construct a system for broad-spectrum disorder detection on  
77 unenhanced brain computed tomography (CT) scans.<sup>3, 4</sup> CT is a first-line diagnostic modality for  
78 assessing brain abnormalities due to its quick acquisition and non-invasive nature. The ISL-based  
79 system was developed using only disorder-free head CT images. It achieved expert-level accuracies  
80 on a retrospective dataset with 127 disorder types and a prospective dataset with 116 disorder types,  
81 surpassing the number of detectable disorder types in previous works. We also applied ISL to build  
82 two additional systems: one for pulmonary disorder detection in CT images and another for retinal  
83 disorder detection in optical coherence tomography (OCT) images. The results demonstrate that  
84 ISL can generalize well to non-brain and non-CT-based disorder detection.

## 85 **Results**

86 **Building an ISL based system for clinically applicable broad-spectrum head disorder**  
87 **detection.** Our proposed ISL-based disorder detection system for brain CT comprises a de-disorder  
88 network (DeDN), a disorder recognition network (DRN), and a disorder locating module. Firstly,  
89 a CT image is processed with specific window width and window locations and then fed into the  
90 DeDN to generate its corresponding de-disorder image. Next, we obtain a difference image by  
91 subtracting the original and generated images. Finally, the difference image is inputted into the  
92 DRN to determine whether any disorder exists in the image. Additionally, the disorder locating  
93 module can be used to locate the disorder. Our goal is to provide an effective tool that can assist  
94 physicians and researchers in quickly identifying images that may contain disorders from a large  
95 volume of CT images for further analysis and diagnosis.

96 To develop the system, we collected CT scans from the Chinese PLA General Hospital  
97 (PLAGH), a leading national hospital that serves patients throughout China. We constructed a  
98 training dataset of 21,429 healthy brain CT scans (March 2012 - July 2019) retrieved from the  
99 picture archiving and communication systems (PACS). The retrieval process involved matching  
100 the fixed description (“No abnormality is observed”) of healthy CT scans with historical diagnosis  
101 reports, resulting in a training dataset that was efficiently obtained without requiring expert effort  
102 or disorder annotation.

103 **Performance on the broad-spectrum head disorder detection.** To evaluate the system, we  
104 obtained a retrospective test dataset from the PLAGH (9,967 scans, 88.23% with 127 types of  
105 disorders, March 2012 - July 2019) and a prospective test dataset from the PLAGH (3,054 scans,  
106 88.70% with 116 types of disorders, July 2019 - August 2021). To demonstrate the clinical

107 applicability of our system, we counted all types of disorders described in clinical reports from the  
108 PLAGH using a rule-based NLP algorithm and manual selection by radiologists. We sorted out  
109 127 and 116 types of disorders for testing, respectively. To our knowledge, these test datasets have  
110 the broadest coverage of head disorder types. The number of scans for each disorder is shown in  
111 Supplementary Table 1 and 2.

112 We employed a disorder-contained/free classification testing strategy for each type of  
113 disorder, with testing carried out at the scan-level. This means that the system predicted whether  
114 the entire scan contained any disorder or not. Scan-level classification is practical for clinical use  
115 as it enables radiologists to quickly identify the presence of disorders, which is particularly useful  
116 in emergency treatment.<sup>5</sup> The label of each scan was determined using disorder-related keywords  
117 in its associated report and then confirmed by radiologists based on the report and CT images.

118 For the retrospective and prospective test datasets, the area under the receiver operating  
119 characteristic curve (AUC) with 95% confidence interval (CI) for the two datasets, along with the  
120 true positive rate (TPR), false positive rate (FPR), and the overall receiver operating characteristic  
121 (ROC) curves, are presented in Supplementary Table 1, 2, 4, and Supplementary Figure 1.  
122 Additionally, Supplementary Table 1 and 2 also present the sensitivity and specificity with 95%  
123 CI for the disorders. On the retrospective dataset, the system achieved an  $AUC > 0.95$  for 43  
124 disorders and an  $AUC > 0.90$  for 74 disorders. On the prospective dataset, the system achieved  
125 an  $AUC > 0.95$  for 30 disorders and an  $AUC > 0.90$  for 50 disorders. These results demonstrate  
126 that our system is capable of detecting a broad spectrum of disorders in brain CT.

127 **Analysis of lesion detection efficacy by size and urgency of treatment.** In our comprehensive  
128 analysis, we delved into the challenges of disorder detection. We identified two primary categories  
129 of challenging cases in disorder detection: those that are small and easily missed, and those that do  
130 not require immediate treatment, which may also be overlooked due to their subtler characteristics.  
131 To conduct a thorough analysis, we divided the cases into three groups based on these dimensions.

132 In terms of lesion size, we classified the cases as large, medium, or small. The classification  
133 outcomes are detailed in Supplementary Table 7. We computed the Area Under the Curve (AUC)  
134 values with 95% CI (Table 1) and plotted ROC curves (Figure 1) for each size category. The AUC  
135 results for different lesion sizes demonstrate AUC accuracies of 0.941, 0.943, and 0.887 for large,  
136 medium, and small lesions, respectively. These figures underscore our model's high accuracy in  
137 detecting even smaller lesions, maintaining a commendable level of recognition precision.

138 When classifying based on the urgency of treatment, we sorted the cases into high, medium,  
139 and low urgency levels, calculating the corresponding AUC values for each. The categories were  
140 defined as follows: *Emergency intervention*. This group encompasses severe disorders  
141 necessitating immediate medical attention, such as certain cancers and other conditions that could  
142 be life-threatening. *Selective intervention*. Disorders in this category may not require urgent  
143 treatment but could necessitate medical intervention as they evolve. *Non-intervention*. This group  
144 includes disorders that generally do not require treatment and have minimal impact on patient  
145 quality of life. Detailed classification results are shown in Supplementary Table 8.



**Table 1. Performance for disorder types across different lesion sizes.**

| Performance vs. Lesion sizes |                      |                      |                      |
|------------------------------|----------------------|----------------------|----------------------|
|                              | <b>AUC</b>           | <b>Sensitivity</b>   | <b>Specificity</b>   |
| Large                        | 0.941 (0.941, 0.942) | 0.883 (0.882, 0.885) | 0.865 (0.864, 0.867) |
| Medium                       | 0.943 (0.943, 0.944) | 0.885 (0.883, 0.886) | 0.875 (0.873, 0.876) |
| Small                        | 0.887 (0.887, 0.888) | 0.885 (0.884, 0.887) | 0.771 (0.770, 0.773) |

**Table 2. Performance for disorder types based on urgency of treatment.**

| Performance vs. Urgency of treatment |                      |                      |                      |
|--------------------------------------|----------------------|----------------------|----------------------|
|                                      | <b>AUC</b>           | <b>Sensitivity</b>   | <b>Specificity</b>   |
| High                                 | 0.942 (0.941, 0.942) | 0.859 (0.858, 0.861) | 0.897 (0.895, 0.898) |
| Medium                               | 0.853 (0.853, 0.854) | 0.849 (0.848, 0.851) | 0.727 (0.726, 0.729) |
| Low                                  | 0.859 (0.859, 0.860) | 0.838 (0.836, 0.840) | 0.737 (0.736, 0.739) |

146           The AUC accuracies and ROC curves for lesions of high, medium, and low urgency are  
147 shown in Table 2 and Figure 2. The AUC results were 0.946, 0.859, and 0.861, respectively. These  
148 results indicate that our model is proficient in identifying lesions with varying degrees of urgency,  
149 effectively recognizing even those with less pronounced features.

150 **Evaluation of system generalizability.** To be practical, an AI-based system should be able to  
151 generalize to new data from different centers and hospitals. In order to evaluate the generalizability  
152 of the ISL-based system, we constructed a cross-center test dataset from the Brain Hospital of  
153 Hunan Province (BHHP), which served as an independent test cohort from PLAGH. This dataset  
154 consisted of 554 scans, of which 59.01% had 46 different types of disorders. It is worth noting that  
155 in the cross-center experiment, we made efforts to collect as much available data as possible to  
156 ensure the comprehensiveness of the tested disorders. However, this approach resulted in a smaller  
157 number of samples for certain disorders (e.g., the total sample size for Basal Ganglia Cerebral  
158 Infarction was 5). As a result, the performance of these specific disorder types may deviate when  
159 compared to the retrospective test set.

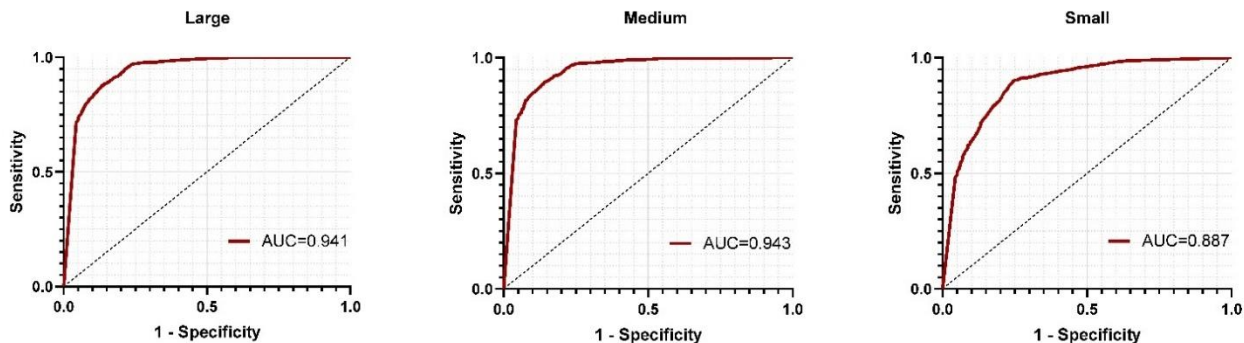

160

**Figure 1. ROC curves for disorder types across different lesion sizes.**

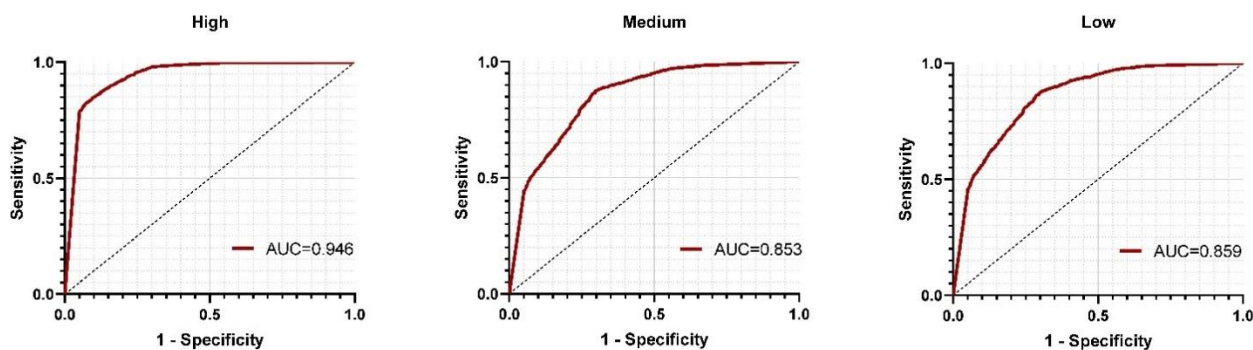

**Figure 2. ROC curves for disorder types based on urgency of treatment.**

161

162 The AUCs with 95% CI for the 46 types of disorders, along with the overall ROC curve are  
163 presented in Supplementary Table 3 and Supplementary Figure 1. The average AUC was 0.866,  
164 which was only 0.017 lower than that of the retrospective intra-center test. These results  
165 demonstrate the generalizability of the system across different centers.

166 **Evaluation of improving expert performance.** In clinical practice, a computer-aided diagnosis  
167 (CAD) system should provide understandable clues to support prediction results. Our model can  
168 quickly and intuitively locate the disorder region based on the generated de-disorder image, as

169 shown in Figure 3a. Additionally, we developed a CAD software for clinical use, as shown in  
170 Figure 3b. The software takes a CT scan as input and outputs possible disorder regions, improving  
171 the diagnosis performance of radiologists.

172 To quantitatively evaluate the improvement, we conducted an experiment involving four  
173 radiologists with diverse levels of experience, ranging from 5 to 14 years. Each radiologist was  
174 tasked with independently reviewing a set of 300 randomly chosen samples from our cross-center  
175 test dataset, which comprised 100 cases with identified disorders and 200 cases deemed healthy.  
176 Initially, the radiologists performed their assessments without the support of our software, relying  
177 solely on their expertise. Subsequently, we introduced the diagnostic suggestions provided by our  
178 software to examine its influence on the radiologists' ability to diagnose accurately.

179 The incorporation of software's insights led to a notable enhancement in diagnostic precision.  
180 The average sensitivity across the four radiologists increased by 0.035, while the specificity saw a  
181 marginal improvement of 0.006. the advancements are visually represented in Figure 4.

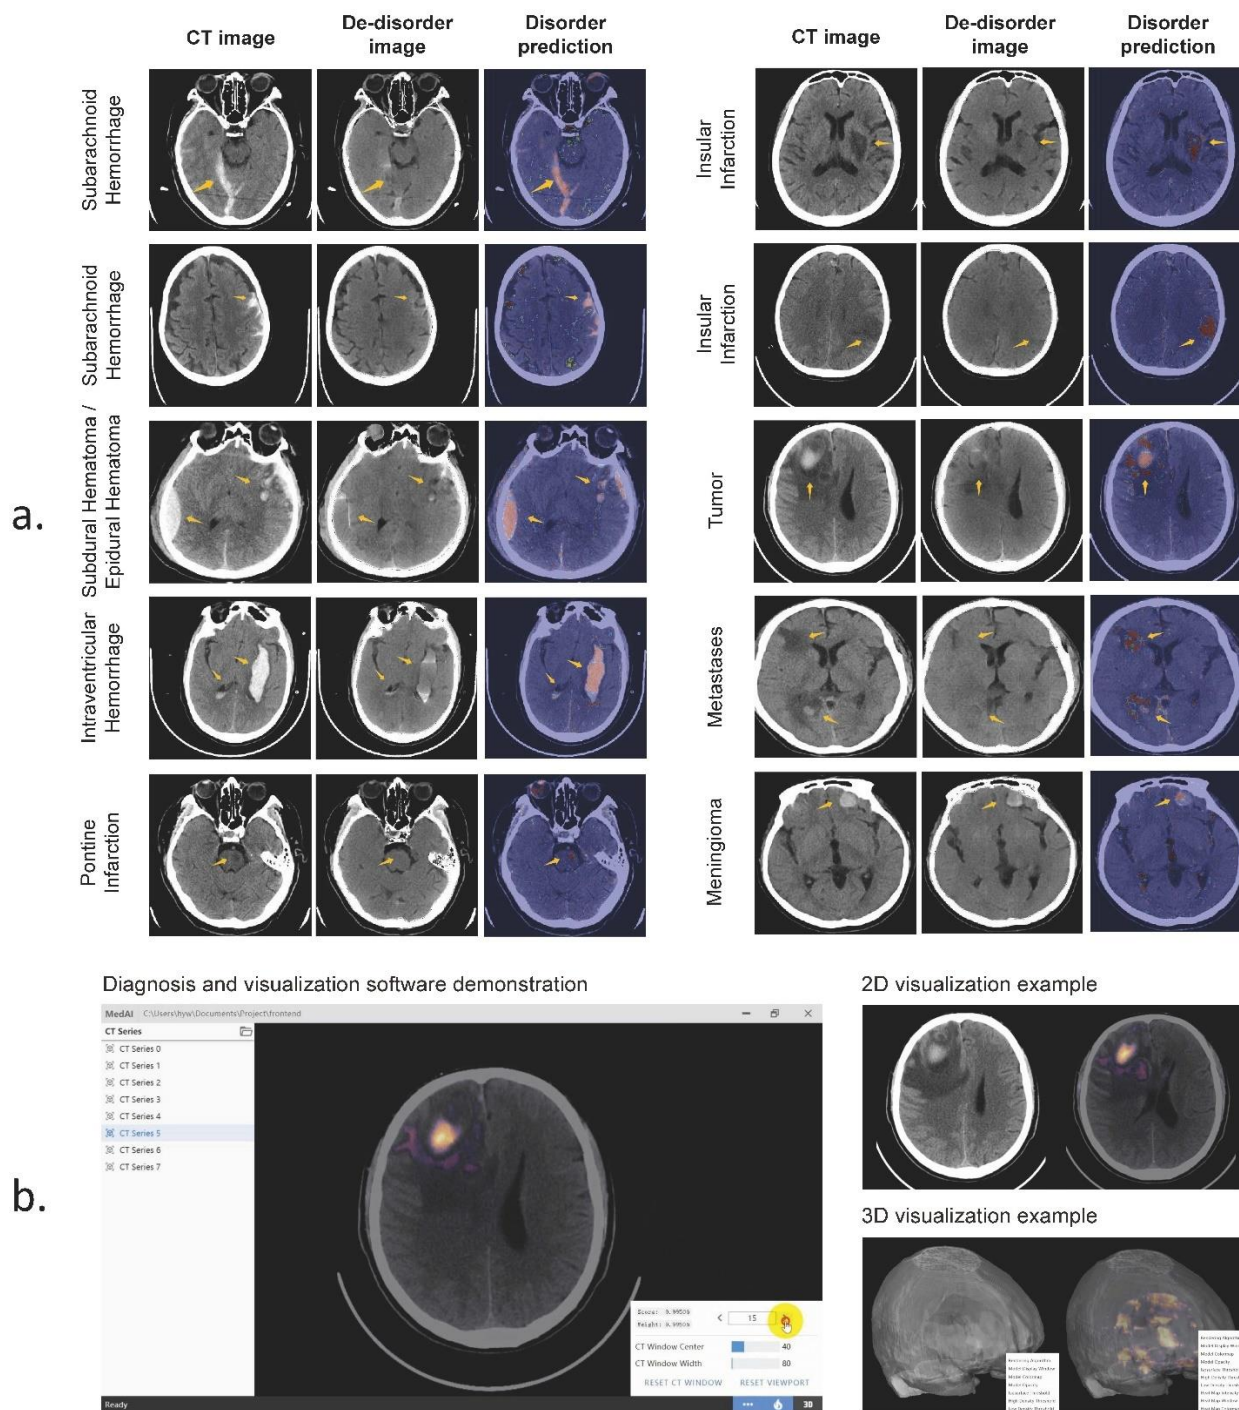

**Figure 3. Visualization examples for head disorder detection.** a) Typical examples of our system’s performance are shown, including the original CT image, the corresponding de-disorder image generated by our system, and the heatmap indicating the probability of containing disorders. Warmer colors in the heatmap indicate a higher probability of disorders. The heatmaps provide visual clues to the system’s decision. b) We also developed a diagnosis and visualization software that takes a CT scan as input and outputs possible disorder locations in the form of a heatmap. The heatmap can be displayed on a 2D slice or on a 3D reconstruction scan.

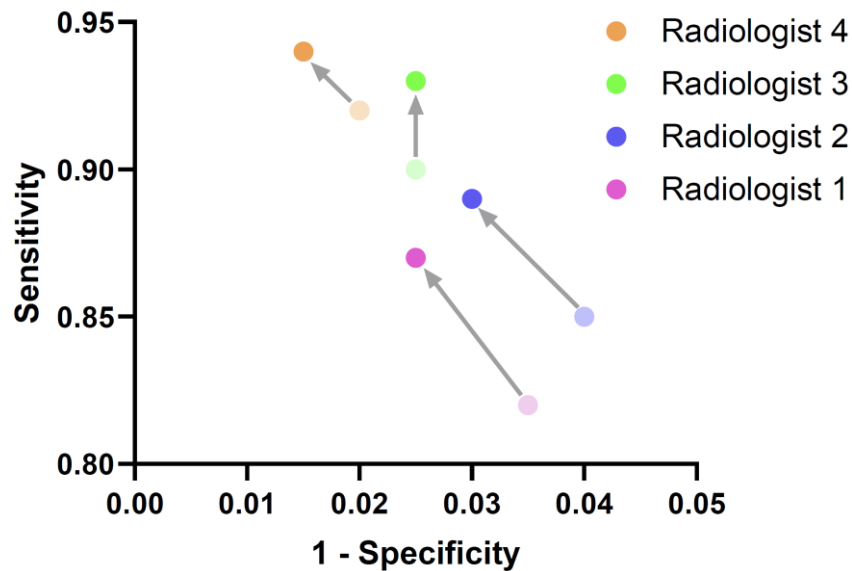

**Figure 4. The performance of four radiologists before and after considering the system recommendation.** The radiologists have 5 (pink), 7 (blue), 10 (green) and 14 (orange) years of working experience.

182 The observed improvements underscore the potential of our software to serve as a valuable tool for  
183 radiologists, particularly in the accurate detection of disorders. The integration of our software into  
184 the diagnostic workflow promises to refine disorder screening processes and support radiologists  
185 in delivering more precise and reliable diagnoses. **The radiologists reported that the system**  
186 **effectively reduced their workload by accurately identifying a broad spectrum of disorders, and**  
187 **contributed to lowering the rate of missed diagnoses. They appreciated the system's ability to**  
188 **provide visually understandable clues, which greatly assisted in their diagnosis process.**

**Analysis of system explainability.** Our system not only detects the disorder location in a slice but also provides the disorder distribution in a scan. Figure 5b shows two example scans with different disorder distributions. Based on the distribution curves supplied by our system, we can observe that the disorders in the two scans have centralized and dispersive distributions, respectively. Figure 5c

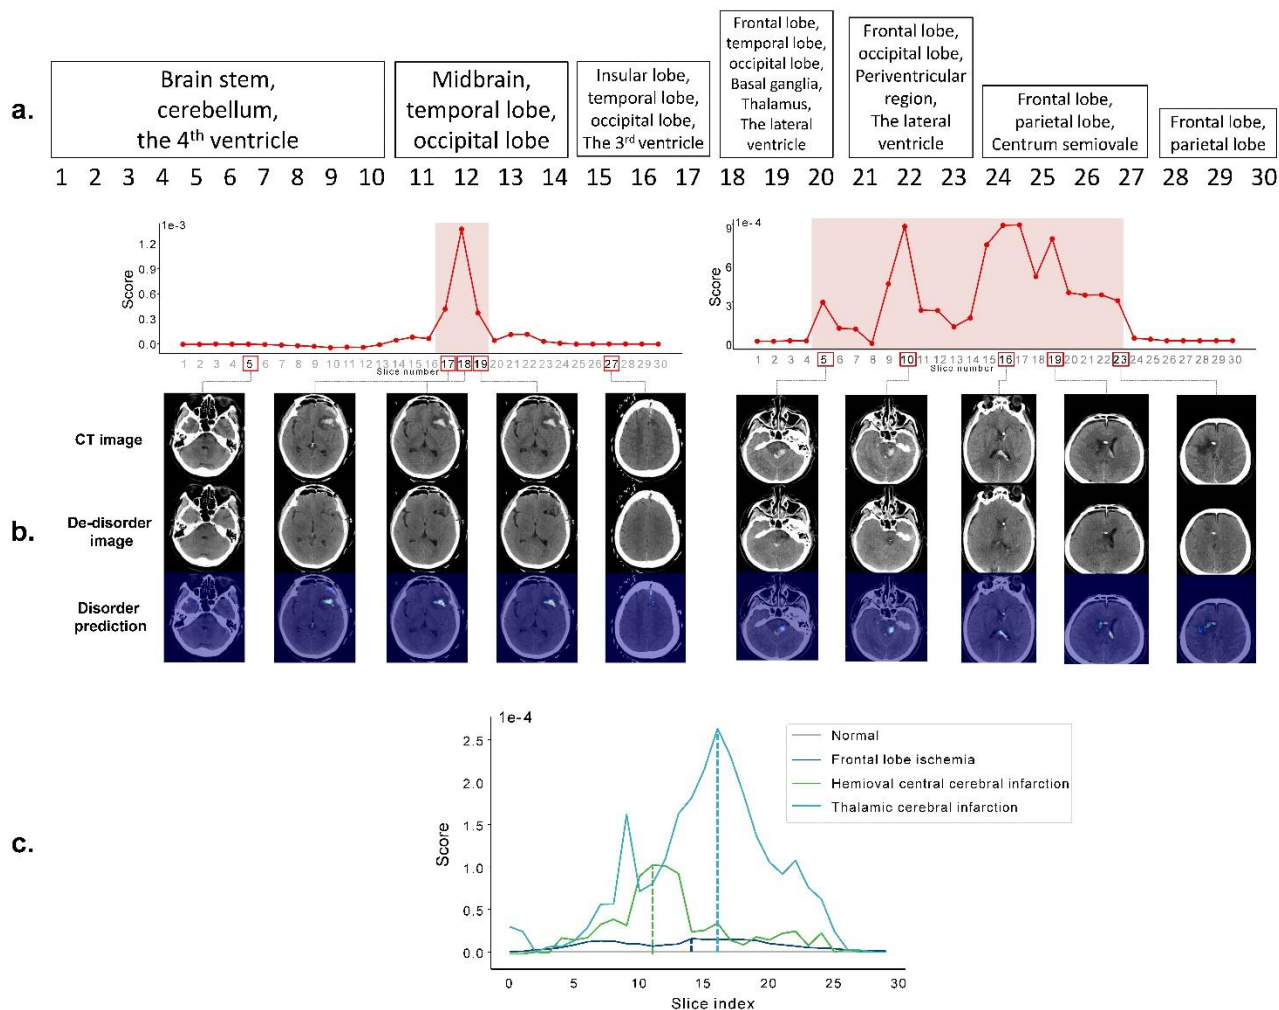

**Figure 5. Patterns of disorder distribution in CT scans.** The x-axis of the graph represents the slice index of a CT scan, while the y-axis represents a slice’s abnormal score. A higher score indicates a greater likelihood of lesions in the slice. **a)** The correspondence between slice indexes and brain tissues is shown. **b)** Two example scans with dispersive and centralized distributions are presented. **c)** The average disorder distributions of some typical disorders in the retrospective dataset are displayed.

189 shows the average disorder distributions for some typical disorders in the retrospective dataset. The  
 190 average distributions are close to the occurrence frequency at different brain tissues in reality,  
 191 demonstrating the effectiveness of the system’s explainability.

192 **Performance contributions from different modules.** This section elaborates on the reasons for

193 adopting each module and demonstrates their contributions to the final performance. The results are  
194 presented in Figure 6.

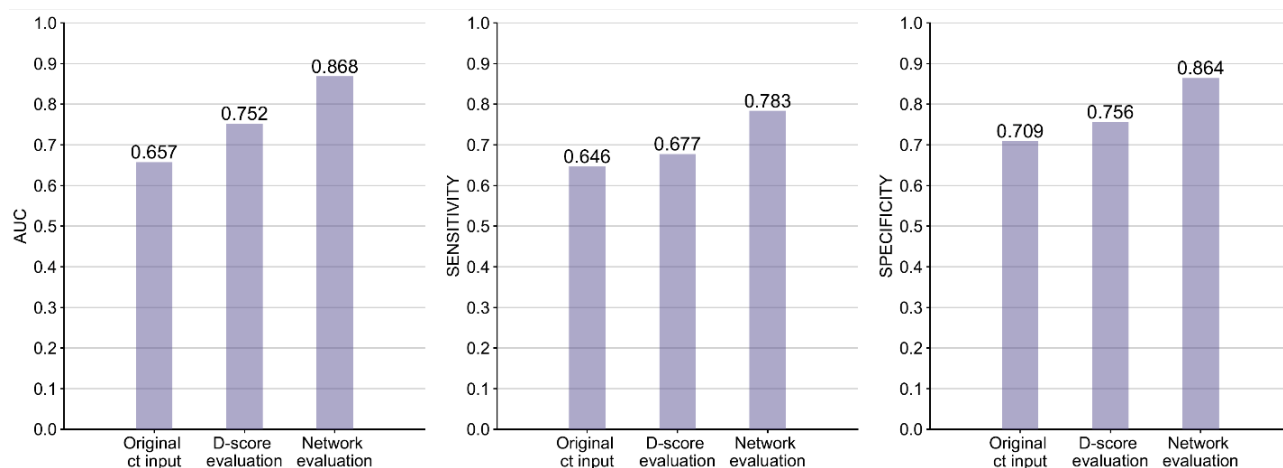

195

**Figure 6. Iterative performance improvement by de-disorder network (DeDN) and disorder recognition network (DRN). Original ct input:** original CT slices + DRN; **D-score evaluation:** DeDN + pixel value sum; **Network evaluation:** DeDN + DRN. The comparison was performed on the prospective test dataset.

196 *Performance contribution from de-disorder network.* In ISL, the evaluation of the probability of  
197 disorder containment depends on the difference image  $\mathbf{x}_{dif}$ , where  $\mathbf{x}_{dd}$  is a de-disorder image generated by a  
198 de-disorder network (DeDN). Original medical images are too complex for a system to learn disorder-related  
199 information solely based on them. Therefore, we do not directly apply original images for evaluation. Using  
200 difference images for evaluation is more intuitive, as the greater the difference between the original and de-  
201 disorder images, the higher the probability of disorder containment.

202 To numerically demonstrate the effectiveness of the difference image generated by the DeDN, we also  
203 applied the original-image-based method for evaluation. As shown in Figure 6, on the prospective test dataset,  
204 the average AUC with 95% confidence interval is 0.657 and 0.752, respectively, where the result from the  
205 original-image-based method (**Original CT input**) is significantly lower than that from the difference-image-

206 based method (**D-score evaluation**). The improved result highlights the value of the DeDN.

207 *Performance contribution from disorder recognition network.* After obtaining the difference image  
208  $\mathbf{x}_{dif}$  with a DeDN, we used a disorder recognition network (DRN) to evaluate the probability of  
209 disorder containment. Although we could determine the probability directly based on the pixel  
210 value sum of the difference image, we did not adopt this strategy. This is because a DeDN cannot  
211 produce perfectly healthy tissue, meaning that even for a healthy area, the pixel value sum of that  
212 area may still be positive. As a result, the accumulated pixel value sum of all healthy areas would  
213 negatively influence the probability evaluation.

214 Instead, we used the pixel sum-based evaluation (**D-score evaluation**) and DRN-based  
215 evaluation (**Network evaluation**) based on the difference image, as shown in Figure 6. The  
216 average AUC of the two methods on the prospective dataset were 0.752 and 0.868, respectively,  
217 demonstrating the superiority of the DRN.

218 **Evaluation of inverse-supervised learning generalizability.** To assess the generalizability of ISL  
219 across different body parts and medical image types, we employed it to develop two additional  
220 systems. The first system is designed for detecting pulmonary disorders in CT images, while the  
221 second system is designed for detecting retinal disorders in optical coherence tomography (OCT)  
222 images.

223 *Performance of pulmonary disorder detection.* In addition to brain CT, we developed an ISL-based  
224 system for detecting disorders in pulmonary CT scans. The data used for system development were



225 collected from the First Affiliate Hospital of Guangzhou Medical University (FAHGMU), another  
 226 leading national hospital that serves patients from across China. We constructed a training dataset  
 227 consisting of 3,410 healthy pulmonary CT scans and a test dataset that included 6 types of  
 228 pulmonary disorders (82 pneumothorax, 86 pneumonia, 96 bronchiectasis, 88 bullae, 82 atelectasis,  
 229 and 46 effusion), as well as 600 healthy scans. The AUCs and detection examples for each type of  
 230 disorder are presented in Table 3 and Figure 7a. The average AUC was 0.893, indicating that ISL  
 231 can generalize well across different body parts.

**Table 3. Performance on the pulmonary CT test dataset for pulmonary disorder detection.**

| Pulmonary CT   |     |                      |                      |                      |
|----------------|-----|----------------------|----------------------|----------------------|
|                | Num | AUC                  | Sensitivity          | Specificity          |
| pneumothorax   | 82  | 0.992 (0.992, 0.992) | 0.996 (0.995, 0.996) | 0.937 (0.935, 0.939) |
| pneumonia      | 86  | 0.911 (0.909, 0.912) | 0.874 (0.869, 0.878) | 0.830 (0.828, 0.831) |
| bronchiectasis | 96  | 0.811 (0.807, 0.811) | 0.697 (0.689, 0.704) | 0.816 (0.815, 0.817) |
| bullae         | 88  | 0.786 (0.782, 0.787) | 0.589 (0.582, 0.595) | 0.827 (0.826, 0.828) |
| atelectasis    | 82  | 0.952 (0.951, 0.952) | 0.984 (0.982, 0.986) | 0.853 (0.852, 0.855) |
| effusion       | 46  | 0.958 (0.956, 0.958) | 0.999 (0.999, 1.000) | 0.883 (0.880, 0.885) |
| avg            | 6/6 | 0.893 (0.891, 0.894) | 0.838 (0.834, 0.842) | 0.854 (0.853, 0.855) |

**Table 4. Performance on the retinal OCT test dataset for retinal disorder detection.**

| Retinal OCT |       |                      |                      |                      |
|-------------|-------|----------------------|----------------------|----------------------|
|             | Num   | AUC                  | Sensitivity          | Specificity          |
| CNV         | 1,220 | 0.939 (0.938, 0.940) | 0.847 (0.844, 0.851) | 0.904 (0.900, 0.907) |
| DME         | 1,600 | 0.913 (0.912, 0.914) | 0.838 (0.835, 0.841) | 0.890 (0.888, 0.893) |
| DRUSEN      | 1,220 | 0.827 (0.826, 0.829) | 0.760 (0.757, 0.764) | 0.762 (0.758, 0.765) |
| avg         | 3/3   | 0.895 (0.894, 0.896) | 0.817 (0.814, 0.820) | 0.855 (0.852, 0.858) |

232 *Performance of retinal disorder detection.* To demonstrate the ability of ISL to generalize across  
 233 different medical image types, we developed a retinal disorder detection system based on optical  
 234 coherence tomography (OCT) images. We used the dataset collected by Kermany et al.,<sup>6</sup> which  
 235 includes 108,312 images (37,206 with choroidal neovascularization, 11,349 with diabetic macular

236 edema, 8,617 with drusen, and 51,140 normal). Following the development procedure of ISL,  
237 we used only the normal OCT images as the training dataset. The model was tested with 1,000  
238 images (250 from each category) from 633 patients, as in Kermany et al.<sup>6</sup> The AUCs with 95%  
239 confidence interval (CI) on the scan-level are summarized in Table 4. The AUCs for choroidal  
240 neovascularization (CNV), diabetic macular edema (DME), and drusen were 0.939, 0.913, and  
241 0.827, respectively. Despite being developed using only normal OCT images, our system achieved  
242 clinically acceptable results, indicating that ISL is applicable to different medical image types.  
243 Detection examples for each type of disorder are shown in Figure 7b.

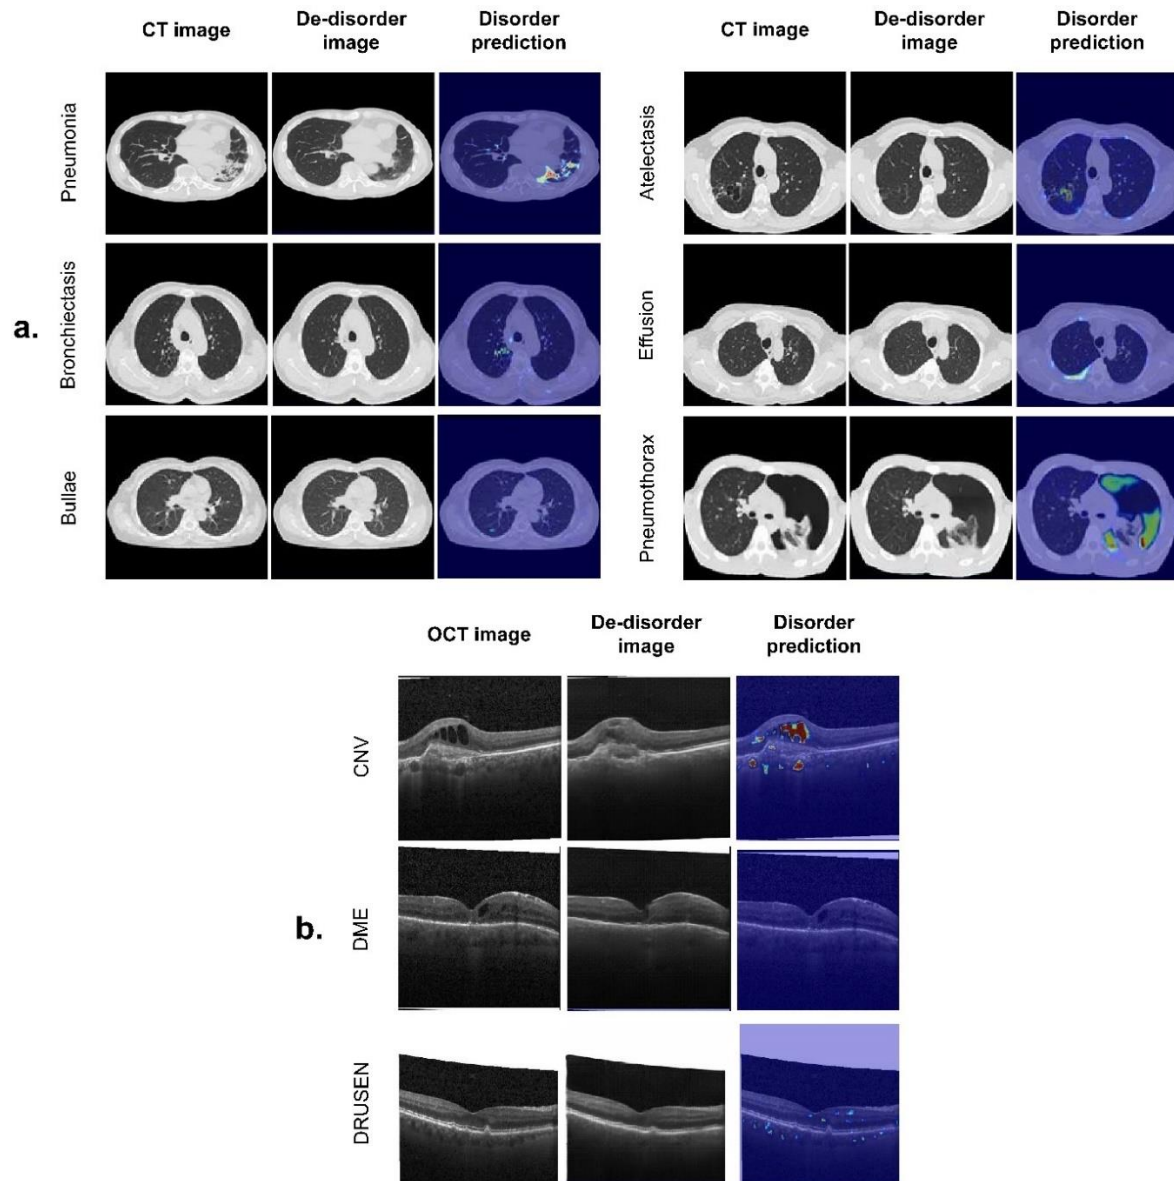

**Figure 7. Examples of our system on the CT-based pulmonary disorder detection and the OCT-based retinal disorder detection.**

244

## 245 Discussion

246 We introduced a learning strategy called inverse supervised learning (ISL) and utilized it to  
247 develop a head disorder detection system that requires no disorder data or annotation during the

248 development process. The system's detectable disorder coverage is comparable to that of a human  
249 expert. Additionally, the system's excellent generalizability and explainability enhance its clinical  
250 applicability.

251 **Annotated and disorder-contained data.** Most existing deep-learning medical systems rely on  
252 supervised learning, which requires a substantial amount of annotated data to achieve  
253 generalizability, accuracy, and recognition gratuity. However, obtaining sufficient annotated data in  
254 medical image research is challenging due to the time-consuming and expert knowledge-intensive  
255 nature of the notating process. For instance, even for an experienced expert, it may take several  
256 minutes to annotate a medical image at the region-level, which provides strong supervision for  
257 disorder detection by indicating the exact lesion region. Consequently, research works that rely on  
258 region-level annotation, such as Nikolov et al.<sup>7</sup> and Monteiro et al.,<sup>8</sup> are limited by the amount of  
259 annotated data, which hinders the generalizability and accuracy of the system.

260 To reduce the dependence on annotated data, researchers have explored alternative learning  
261 strategies for medical image research. For instance, weakly-supervised learning<sup>9,10,11</sup> allows each  
262 training sample to lack a label or have an incorrect label, significantly reducing the annotation cost  
263 for experts. Unsupervised learning, on the other hand, uses unannotated training data to enhance  
264 the feature representation capacity of a deep learning network, thereby reducing the number of  
265 required annotated samples. Self-supervised learning is a recent representative unsupervised  
266 learning method<sup>12, 13</sup> that annotates each sample by itself instead of relying on human experts.  
267 However, these learning strategies require a substantial amount of disorder-contained data to

268 ensure accuracy. Collecting enough disorder-contained data is challenging for general researchers  
269 due to ethical and legal considerations, limiting related research to large medical institutions. For  
270 example, Chilamkurthy et al.<sup>5</sup> collected over 300,000 brain CT scans from more than 20 medical  
271 centers, which is beyond the reach of most researchers.

272 Compared to previously adopted learning strategies in medical image research, the proposed  
273 ISL tackles a challenging task where no annotated or disorder-contained data is available. The only  
274 available data is disorder-free data, which can be easily obtained by any medical institution capable  
275 of medical imaging scans.

276 **Disorder coverage.** The clinical application of medical image research is an important goal.  
277 However, most existing works focus on only one or two common disorder types,<sup>5, 14</sup> even for  
278 systems developed by institutions with abundant medical resources. For instance, the system<sup>5</sup> is  
279 derived from over 300,000 scans, yet it can only recognize four types of disorders. This challenge  
280 arises from two aspects. Firstly, it is impractical for researchers to construct models for each disorder  
281 type due to the difficulty of collecting and annotating medical images. Secondly, developing models  
282 for rare disorders with previous learning strategies is challenging when only a few samples are  
283 available. With ISL, researchers do not need to collect data or construct models for specific  
284 disorders, enabling the built system to achieve broad-spectrum disorder detection.

285 **Anomaly Detection.** Distinguishing disorder-contained images from disorder-free ones can be  
286 viewed as an anomaly detection problem, which is a popular research field in machine learning.  
287 An intuitive assumption is that anomalies lie outside the distribution of normal samples. Therefore,

288 it is natural to train a classifier to differentiate abnormal samples from normal ones.<sup>15,16</sup>

289         Recent works have utilized generation networks for anomaly detection, employing two  
290 primary approaches: (1) utilizing the latent feature;<sup>17, 18, 19</sup> and (2) utilizing the reconstructed  
291 image.<sup>20, 21, 22</sup> In the first approach, a generation network produces a latent feature and a  
292 reconstructed image when an image is inputted. The latent features can be used to determine  
293 whether the im- age is abnormal. In the second approach, a generation network produces a  
294 corresponding normal image for a given image. If the original image contains abnormal  
295 characteristics, it can be recognized based on the difference between the original and generated  
296 images. In the field of medical image analysis, two types of methods have achieved certain results  
297 in specific diseases.<sup>23,24,25</sup> For instance, Yao et al.<sup>23</sup> used the second approach to generate healthy  
298 pulmonary CT images, which were used to determine whether the lungs contained COVID-19.

299         However, both approaches have limitations when applied to broad-spectrum disorder  
300 detection in medical images. In the first approach, medical images are complex, which results in  
301 complex latent features. Therefore, recognizing disorder-contained images based solely on latent  
302 features is challenging. To demonstrate this, we compared our method with a baseline method that  
303 directly fed original medical images into the disorder recognition network. The baseline method  
304 achieved an average AUC of 0.653 on the prospective dataset, which is inferior to the results (AUC  
305 0.868) obtained by our method. In the second approach, existing generation-based methods  
306 reconstruct the original disorder tissues of a medical image due to the strong feature representation  
307 capability of generative networks, which fails to achieve abnormal recognition. With the  
308 generation strategy in ISL, only context images and global structure information are provided,

309 allowing the generation network to eliminate the interference of the original disorder tissue and  
310 conceive healthy tissues like a radiologist. To showcase the efficacy of our system in comparison to  
311 existing techniques, we conducted a comparative analysis with other representative reconstruction-  
312 based anomaly detection methods, specifically Auto-Encoder,<sup>26</sup> AnoGAN,<sup>17</sup> GANomaly,<sup>27</sup>  
313 pix2pix,<sup>28</sup> and Cycle-GAN.<sup>29</sup> The experiment was carried out on the task of detecting pulmonary  
314 disorders. The results of the analysis are presented in Supplementary Table 12. Our system  
315 outperformed the baselines, with the highest AUC of 0.846 achieved by GANomaly, which is 0.047  
316 lower than our method. This significant improvement underscores the ability of our ISL-based  
317 system to successfully accomplish disorder recognition tasks.

## 318 **Methods**

319 **CT scan collection.** Initially, we retrieved 954,508 scans from the PACS of the PLAGH between  
320 March 2012 and July 2019. These scans contained CT images stored in DICOM (digital imaging  
321 and communications in medicine) format, and all DICOMs were de-identified before data analysis.  
322 We then screened the scans by excluding reconstructed scans (processed with algorithms in CT  
323 machines), non-axial-section scans (coronal section and sagittal section scans), non-head scans  
324 (scans of breast and full-body, etc.), and non-origin scans (scans of CTA and CTP, etc.). The  
325 inclusion and exclusion criteria of the screening process are detailed in Figure 8. After screening,  
326 a total of 62,239 CT scans with an average slice number of 28 were selected.

327 **Disorder types statistics.** Each retrieved scan includes a clinical report written by an interpreting  
328 radiologist during the examination. To determine the disorder types to be interpreted by our system,

329 we first applied a rule-based NLP algorithm to the clinical reports. This algorithm counted the  
330 occurrence frequencies of different word phrases. We then invited three radiologists to analyze the  
331 frequency statistics results and select the disorder types to be evaluated. Ultimately, 127 types of  
332 disorders were selected.

333 Our method selection was primarily driven by the desire to create a system capable of  
334 handling the most common types of disorders encountered in actual clinical practice, while also  
335 ensuring a comprehensive coverage of various disorder types. Our dataset, which spans nearly  
336 seven years (2012 to 2019) and includes data from 301 hospitals, is believed to encompass most  
337 types of disorders. By focusing on the most frequently occurring disorder types, we aimed to  
338 enhance the practicality of our system, ensuring it is well-equipped to manage common disorders  
339 while maintaining a broad scope of disorder types.

340 **Training dataset and test dataset.** The construction of the development and test datasets relied  
341 on the clinical reports, which were considered the gold standard. The training dataset only included  
342 disorder-free CT scans, and their reports uniformly described them as “No abnormality is observed.”  
343 Therefore, we could efficiently obtain disorder-free CT scans. Ultimately, we selected 22,602  
344 disorder-free scans, which were divided into two parts: the training dataset (21,429 scans) and the  
345 negative samples in the retrospective test dataset (1,173 scans), detailed data statistics are shown  
346 in Supplementary Table 5.

347 Regarding the positive samples (disorder-contained scans) in the test dataset, we initially  
348 retrieved 18,514 scans using stated disorder-related keywords. We then invited 30 board-certified



349 radiologists with 6 to 15 years of experience to label each scan based on the images and its  
350 associated report. The radiologists assigned a binary label (i.e., 0, 1) to each scan, where 1 indicated  
351 that the scan contained the expected disorder type. Ultimately, 8,794 scans were labeled as 1 and  
352 selected as the positive samples in the retrospective test dataset. The prospective and cross-center  
353 test datasets were constructed similarly. However, due to the smaller data amounts compared to the  
354 retrospective dataset, they also contained a smaller number of disorder types, specifically 116 and  
355 46, respectively. Please refer to Supplementary Table 9-11 for the detailed data statistics.

356 **Developing a system with inversed-supervised learning.** ISL allows for the training of a deep  
357 learning network without accessing disorder-contained samples, enabling researchers with only  
358 general and healthy images to build a broad-spectrum disorder detection system. ISL is built on  
359 two technologies: missing information completion and data distribution estimation. Missing  
360 information completion enables a system to reconstruct healthy tissues of masked parts of a medical  
361 image using a de-disorder network (DeDN) derived from general and healthy images. The scanning  
362 medical images of the human body are relatively standardized. Therefore, for healthy images, the  
363 reconstructed version should be very close to the original version. And for a medical image  
364 containing any disorders, the reconstructed image will differ significantly from the original. Data  
365 distribution estimation requires the estimation of the distribution of healthy difference images,  
366 which are calculated using healthy images and their reconstructed images generated by a DeDN.  
367 If an image contains any disorders, its difference image will fall outside the distribution and be  
368 detected. Notably, unlike many existing disorder detection algorithms, ISL can detect a  
369 significantly increased number of disorder types.

370 **CT slice conversion.** In our dataset, the pixel values in a CT scan are represented by 14-bit  
371 numbers, which exceed the range of human perception. To address this, we converted each CT  
372 slice into a 3-channel 8-bit image, conforming to the standard image format and suitable for  
373 display. Radiologists typically use specific window locations (WL) and window widths (WW) to  
374 observe various types of disorders. Building on this, we applied specific WL and WW settings for  
375 the image conversion, with the specific settings outlined in Supplementary Table 16.

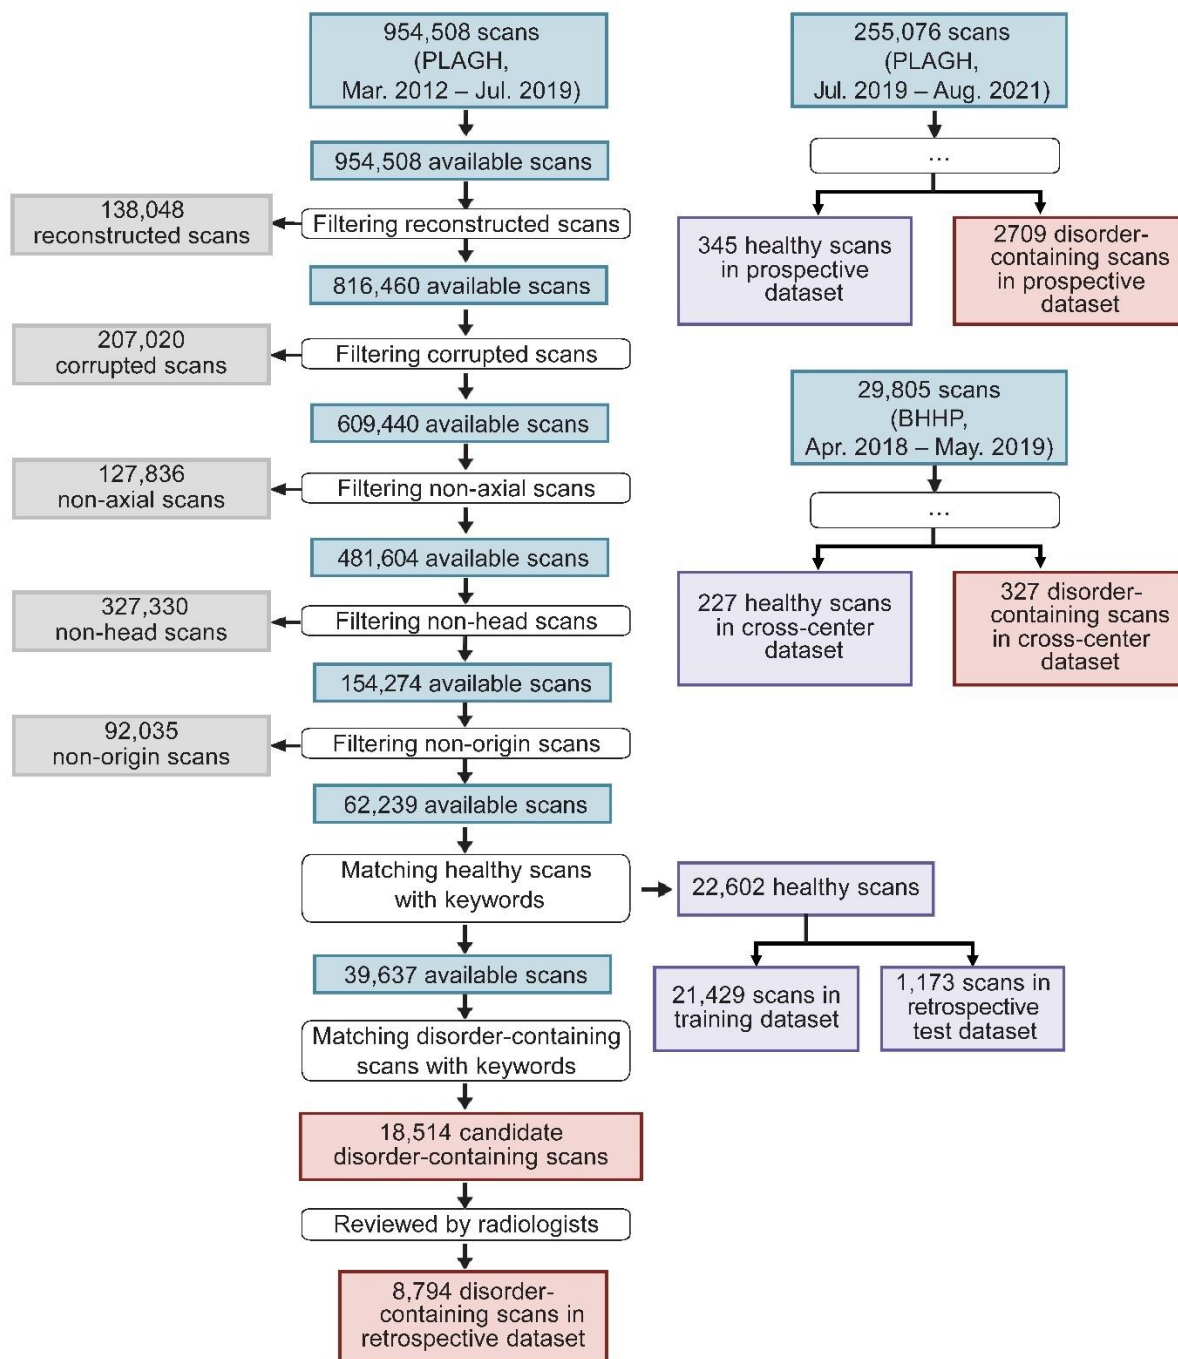

**Figure 8. The process of constructing the datasets.** *Left*, 954,508 scans (March 2012 - July 2019) were collected from the PLAGH by retrieving head CT-related keywords. After a series of filtering steps, a training dataset and a retrospective dataset were constructed. The training dataset consisted of 21,429 healthy scans, and the retrospective dataset consisted of 1,173 healthy scans and 8,794 disorder-containing scans. *Right*, we collected 255,076 scans (July 2019 - August 2021) from the PLAGH and 29,805 scans (April 2018 - May 2019) from the BHHP. We used these data to construct the prospective and cross-center test datasets using the same process.

376 **Problem Formulation.** ISL is designed to address binary-classification problems by predicting  
377 the probability of the presence of any disorder type in a medical image. For example, in brain CT  
378 scans, the input of an ISL-based system is a slice  $\mathbf{x}_i$  from a brain CT scan for a CT scan  
379  $\{\mathbf{x}_i\}_{i=1}^N$ , where  $N$  is the slice number of this scan. The system output  $p_i$  indicates the probability  
380 of any disorder type in the slice  $\mathbf{x}_i$ . During deployment, the slice-level outputs  $\{p_i\}_{i=1}^N$  are  
381 aggregated to a scan-level output  $p'$  by averaging the probabilities of all the slices in the scan,  
382 where  $p' = \frac{1}{N} \sum_{i=1}^N p_i$ . We adopt the slice-wise processing method because we believe that, for  
383 the initial assessment of disorders in medical image analysis, the information provided by a single  
384 image is already adequate. Slice-wise processing offers a more efficient strategy, where sequential  
385 information is utilized to confirm the precise categories of disorders. As the ISL-based system  
386 processes individual slices, we have omitted the subscript number of slices in a scan for the sake  
387 of conciseness in the following method introduction.

388 An ISL-based system comprises two networks: a de-disorder network (DeDN) and a disorder  
389 recognition network (DRN). Given a medical image  $\mathbf{x}$ , we first use a DeDN to generate a de-  
390 disorder image  $\mathbf{x}_{dd}$  of  $\mathbf{x}$ . If  $\mathbf{x}$  contains a disorder, the disorder tissues in the area are converted  
391 into healthy ones. Then, the difference image  $\mathbf{x}_{dif} = \|\mathbf{x} - \mathbf{x}_{dd}\|$  is input into the DRN network, which  
392 predicts the probability  $p$  of disorder containment in the image. The overview of ISL is shown in  
393 Figure 9.

394

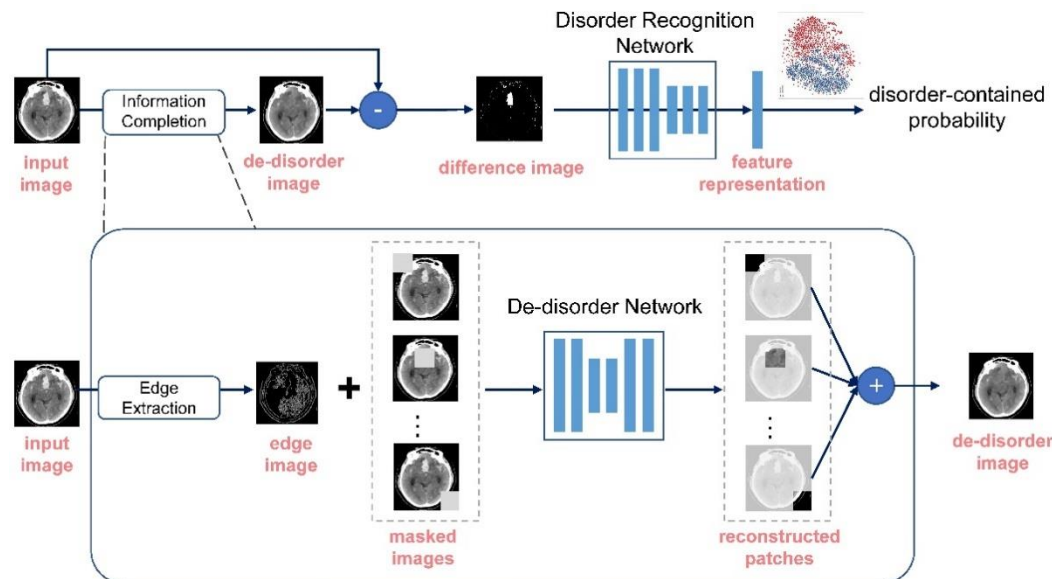

**Figure 9. The overview of ISL, a learning algorithm for developing broad-spectrum disorder detection systems.** The training dataset consists only of healthy scans, and a de-disorder network is learned to generate de-disorder images. A disorder recognition network is then employed to predict the probability of disorder containment based on the difference image obtained by subtracting the input and de-disorder image. This approach enables the developed model to achieve broad-spectrum disorder detection even without any disorder-contained data.

395 **De-disorder network.** Given a masked image,  $\bar{\mathbf{x}} = \mathbf{x} \cdot \mathbf{m}$ , where  $\mathbf{m}$  is an image mask of  $\mathbf{x}$ , a deep  
 396 encoder-decoder network (DeDN) can predict the masked region and generate a reconstructed image  
 397  $\hat{\mathbf{x}}$ . The detailed architecture of the DeDN is shown in Supplementary Table 15, which has been  
 398 proven to be effective in many image generation tasks. In our architecture comparison  
 399 experiment (Supplementary Table 13), we found that the adopted architecture has already captured  
 400 the most salient features necessary for generating high-quality medical images. In this study, we  
 401 utilized the DeDN to generate de-disordered medical images. Specifically, we divided a medical  
 402 image  $\mathbf{x}$  into  $K \times K$  grids of uniform size. For each grid with coordinates  $(i, j)$ , where  $1 \leq i \leq$   
 403  $K$  and  $1 \leq j \leq K$ , we applied a mask  $\mathbf{m}^{(i,j)}$  to erase it and obtain a masked image. The DeDN was

404 then used to reconstruct the masked image and generate the reconstructed image  $\hat{\mathbf{x}}^{(i,j)}$ . Finally, we  
 405 combined the  $K \times K$  generated images into a reconstructed de-disordered medical image using the  
 406 following equation:

$$\mathbf{x}_{dd} = \sum_{i=1}^K \sum_{j=1}^K \hat{\mathbf{x}}^{(i,j)} \cdot (\mathbf{1} - \mathbf{m}^{(i,j)}) \quad (1)$$

407 We will use  $\mathbf{x}_{dd}$  for comparative analysis with the original image  $\mathbf{x}$ . A deep encoder-decoder  
 408 network (DeDN) takes as input a masked image  $\bar{\mathbf{x}}^{(i,j)}$  and multiple image edge maps  $\{\mathbf{e}_k\}_{k=1}^{n_e}$  of  
 409  $\mathbf{x}$ . Edge maps retain structural information of the masked region, which can improve the quality of  
 410 the reconstructed image. Edge maps can be constructed using mature image processing schemes,  
 411 such as the Canny Edge Detector.<sup>30</sup> The DeDN  $G$  generates the reconstructed image  $\hat{\mathbf{x}}^{(i,j)}$  using  
 412 the following equation:

$$\hat{\mathbf{x}}^{(i,j)} = G\left(\bar{\mathbf{x}}^{(i,j)}, \{\mathbf{e}_k\}_{k=1}^{n_e}\right). \quad (2)$$

413 We trained the network using a joint loss:

$$\mathcal{L}_{de} = \lambda_{\ell_1} \mathcal{L}_{\ell_1} + \lambda_{adv} \mathcal{L}_{adv} + \lambda_p \mathcal{L}_{perc} + \lambda_s \mathcal{L}_{style}, \quad (3)$$

414 which includes an  $\ell_1$  loss, adversarial loss, perceptual loss, and style loss. The  $\ell_1$  loss minimizes  
 415 the reconstruction error between  $\hat{\mathbf{x}}^{(i,j)}$  and  $\mathbf{x}$ . The adversarial loss  $\mathcal{L}_{adv}$  ensures the reality of the  
 416 generated image and is defined as:

$$\mathcal{L}_{adv} = \mathbb{E}_{(\mathbf{x})} [\log D(\mathbf{x})] + \mathbb{E}_{(\mathbf{x}, \mathbf{m}^{(i,j)})} \log \left[ 1 - D\left(G\left(\bar{\mathbf{x}}^{(i,j)}, \{\mathbf{e}_k\}_{k=1}^{n_e}\right)\right) \right], \quad (4)$$

417 where  $D$  is the discriminator network. We also included perceptual loss  $\mathcal{L}_{\text{perc}}$  and style loss  $\mathcal{L}_{\text{style}}$ ,  
418 following Nazeri et al.<sup>31</sup> The perceptual loss  $\mathcal{L}_{\text{perc}}$  penalizes reconstructed images that are not  
419 perceptually similar to the original ones and is defined as a distance measure between activation  
420 maps of a pretrained network:

$$\mathcal{L}_{\text{perc}} = \mathbb{E}_{(\mathbf{x})} \left[ \sum_i \frac{1}{n_a} \|\phi_i(\mathbf{x}) - \phi_i(\hat{\mathbf{x}})\|_1 \right], \quad (5)$$

421 where  $\phi_i$  is the activation map of the  $i^{\text{th}}$  layer of the pretrained VGG-19 network, and  $n_a$  is the  
422 number of layers. We chose the output of the first ReLU activation layer in each of the five blocks<sup>31</sup>  
423 of VGG-19 pretrained on the ImageNet dataset.<sup>32</sup> This choice was based on its proven effectiveness  
424 in capturing image features. The comparison experiment on the cross-center test dataset showed similar  
425 results to ResNet34 (Supplementary Table 14), indicating the robustness of our model to the choice of  
426 architecture for perceptual loss calculation.

427 The style loss is calculated based on these activation maps and is an effective tool to alleviate  
428 the “checkerboard” artifacts caused by transpose convolution layers. The loss measures the  
429 differences between covariances of the activation maps and is defined as:

$$\mathcal{L}_{\text{style}} = \mathbb{E}_{(\mathbf{x})} \left[ \sum_i \frac{1}{n_a} \|G_i^{\phi_i}(\mathbf{x}) - G_i^{\phi_i}(\hat{\mathbf{x}})\|_1 \right], \quad (6)$$

430 where  $G_i^{\phi_i} = \phi_i \phi_i^T$  is a Gram matrix constructed from the activation map  $\phi_i$ . The Gram matrix of an  
431 activation map captures the correlation between different channels and the texture structure of its  
432 corresponding image. For a real medical image, the Gram matrix resembles the identity matrix, with larger

433 diagonal values indicating strong correlations within the same feature and smaller off-diagonal values  
434 reflecting feature in-dependence. Conversely, a blurry and texture-lacking generated image results in a  
435 constant Gram matrix with similar values for each element, indicating a lack of feature differentiation. To  
436 optimize the model, we minimize the difference between the Gram matrices of the real and generated  
437 images.

438 **Disorder recognition network.** To minimize the impact of reconstructed noise on disorder  
439 detection and improve the performance further, we developed a disorder recognition network that  
440 takes the difference image  $\mathbf{x}_{dif}$  as input and extracts an embedded representation in the latent space.  
441 We designated the embedding distribution of difference images from disorder-free data as the  
442 reference distribution. The disorder recognition network should ensure that the embeddings of  
443 disorder-free data are centralized and compact, while the embeddings of disorder-contained data  
444 are random and as far as possible from the reference distribution. In this case, the distance between  
445 an embedded representation and the center of the reference distribution can effectively indicate the  
446 possibility of disorder presence.

447 Inspired by the support vector data description (SVDD) algorithm<sup>33</sup> and the contrastive  
448 learning method,<sup>34</sup> we developed the DRN based on augmentation views. **In addition to a given**  
449 **healthy medical image  $\mathbf{x}$ , the DRN uses two augmented views,  $\mathbf{x}^-$  and  $\mathbf{x}^+$ , generated from  $\mathbf{x}$  for**  
450 **network training.  $\mathbf{x}^-$  is produced with rotation and flipping transformations, yielding an**  
451 **appearance akin to  $\mathbf{x}$ .  $\mathbf{x}^+$ , on the other hand, is generated with cutout transformation, which can**  
452 **damage healthy tissues in  $\mathbf{x}$ . As a result,  $\mathbf{x}^+$  disrupts the inherent distribution of the healthy**  
453 **image  $\mathbf{x}$  and is thus considered a disorder-contained view. For DRN, the main basis for**



454 judgment is the size of the pixel difference and the range of difference. Therefore, by applying  
455 cutout transformation to the original healthy image, we can obtain images with large pixel  
456 differences and a wide range of differences. This difference, or 'anomaly', is what DRN is trained  
457 to detect.

458 After training the DeDN, the input of the DRN consists of three parts: the reference  
459 difference image  $\mathbf{x}_{dif}$ , the negative difference image  $\mathbf{x}_{dif}^- = \|\mathbf{x}^- - \hat{\mathbf{x}}_{dd}^-\|$ , and the positive difference  
460 image  $\mathbf{x}_{dif}^+ = \|\mathbf{x}^+ - \hat{\mathbf{x}}_{dd}^+\|$ , where  $\hat{\mathbf{x}}^+$  and  $\hat{\mathbf{x}}^-$  denote the reconstructed images of  $\mathbf{x}^-$  and  $\mathbf{x}^+$ ,  
461 respectively. The DRN extracts embedded representations of the difference images, denoted as  $\mathbf{h}$ ,  
462  $\mathbf{h}^-$ , and  $\mathbf{h}^+$ . The DRN learns reasonable embedded representations of disorder-free input by  
463 maximizing the similarity between  $\mathbf{h}^-$  and  $\mathbf{h}$  while distinguishing  $\mathbf{h}^+$  from  $\mathbf{h}$ . In this study, we  
464 used the Euclidean distance as the metric to measure the similarity of the embeddings. We pre-  
465 trained the network using MoCo<sup>12</sup> and averaged the embeddings of the wide-ranging training  
466 dataset. The averaged embedding  $\mathbf{c}$  is considered the center of the reference distribution. Setting  
467 the center as an anchor, we designed a compactness loss to maximize the similarity between the  
468 negative embeddings:

$$\mathcal{L}_{\text{com}} = \mathbb{E}_{(\mathbf{h})} [\|\mathbf{h} - \mathbf{c}\|_2] + \mathbb{E}_{(\mathbf{h}^-)} [\|\mathbf{h}^- - \mathbf{c}\|_2], \quad (7)$$

469 where  $\mathcal{L}_{\text{com}}$  minimizes the distances between the embeddings  $\mathbf{h}$ ,  $\mathbf{h}^-$  and the reference center, which  
470 ensures that the DRN can extract consistent features for disorder-free difference images. To further  
471 improve the discriminative ability of the network, we used a discrimination loss  $\mathcal{L}_{\text{dis}}$ , which forces

472 the network to maximize the distance between the reference center and the embedded  
473 representation of  $\mathbf{x}^+$  :

$$\mathcal{L}_{\text{dis}} = -\mathbb{E}_{(\mathbf{h}^+)} \left[ \left\| \mathbf{h}^+ - \mathbf{c} \right\|_2 \right]. \quad (8)$$

474 The overall loss function utilized to train the DRN is defined as:

$$\mathcal{L} = \lambda_c \mathcal{L}_{\text{com}} + \lambda_d \mathcal{L}_{\text{dis}} , \quad (9)$$

475 where  $\lambda_c$  and  $\lambda_d$  are the weights of the loss functions  $\mathcal{L}_{\text{com}}$  and  $\mathcal{L}_{\text{dis}}$  , respectively.

476 **Disorder visualization.** The ISL-based system is capable of identifying the locations of disorders,  
477 which is crucial for clinical applications.<sup>35, 36, 1</sup> Higher pixel values in the image regions of  $\mathbf{x}_{\text{dif}}$   
478 indicate a higher likelihood of the presence of a disorder. To enhance the visual appeal of the results,  
479 we conducted several post-processing steps on  $\mathbf{x}_{\text{dif}}$  : (1) Eliminating the bias caused by the normal  
480 range reconstruction. Pixels with values below a certain threshold  $t$  were set to zero. (2) Reducing  
481 reconstruction noise. After normalizing the pixel values to the range of  $[0, 1]$ , we added the values  
482 of the  $s \times s$  region surrounding each pixel to itself. This smoothing technique reduced the noise in  
483 the image. (3) Enhancing the disorder area. We utilized an exponential function to manipulate the  
484 pixel values, resulting in an amplification of the differences in values among pixels. This process  
485 serves to accentuate the presence of disorder within the region of interest.

486 With processed  $\mathbf{x}_{\text{dif}}$  , which is denoted as  $\mathbf{x}_{\text{dif}}^*$  , we employed the Average Pixel Difference  
487 Score (APDS) as a metric to quantify the discrepancy between the original and the reconstructed

488 images. The APDS is computed by averaging the pixel values of the processed  $\mathbf{x}_{dif}$ , within the  
489 effective pixel area. This area encompasses human body structures and is differentiated by non-  
490 zero pixel values. Formally, given an image  $\mathbf{x}$ , its APDS is calculated as the ratio of the sum of  
491 pixel values in the original image  $\mathbf{x}$  to the number of non-zero pixels in the corresponding  
492 processed difference image  $\mathbf{x}_{dif}^*$ , denoted as  $sum(\mathbf{x}_{dif}^*) / count(\mathbf{x} > 0)$ . Our experimental results  
493 revealed that the APDS for normal images was approximately  $5 \times 10^{-5}$ . In contrast, for images  
494 with lesions, this metric typically escalated to an order of  $5 \times 10^{-4}$ . The observed difference in  
495 these metrics is substantial enough to effectively distinguish between normal images and those  
496 with lesions.

497 **Model selection and statistical analysis.** Since we were unable to access data containing disorders  
498 for model evaluation during training, we selected the model when the training loss did not decrease  
499 for 5 consecutive epochs. The primary parameters of our system, including the network  
500 architectures, hyperparameter values, and optimization strategies, are presented in Supplementary  
501 Tables 15 and 16. To ensure statistical significance, we applied 95% confidence interval (CI).  
502 Specifically, for each iteration, we randomly sampled 30% of CT scans from the test dataset for  
503 evaluation. We repeated this procedure 1,000 times and calculated the 95% CI of the evaluation  
504 metrics for the model. To determine the optimal classification threshold, we used a derivative-based  
505 method, specifically by maximizing the harmonic mean of sensitivity and specificity. This is  
506 expressed in the following optimization criterion: [Maximize  $(2 * sensitivity * specificity) /$   
507  $(sensitivity + specificity)$ ]. This criterion is known as a variant of the F1 score, which balances

508 sensitivity and specificity to achieve the best trade-off between the two.

509 **Code and software availability.** The system was developed using standard libraries and scripts  
510 available in Porch. The developing code is at <https://gitlab.com/heyuwei403/islcode>. The code will  
511 be made publicly available after the acceptance. A demo video of our diagnosis and visualization  
512 software is at <https://gitlab.com/heyuwei403/isl-system-demo>.

513 **Data availability.** The datasets to develop our head and pulmonary disorder detection system are  
514 not publicly available due to the privacy requirement of the PLAGH and FAHGMU. The cross-  
515 center dataset (554 scans and experts' annotations) from BHHP is allowed to be distributed for  
516 research purposes from the corresponding author upon reasonable request. The development and  
517 evaluation dataset for retinal OCT disorder detection can be downloaded from [https://data.mendeley.com/  
518 datasets/rsbjbr9sj/2](https://data.mendeley.com/datasets/rsbjbr9sj/2).

## 519 **References**

- 520
- 521 1. Lundberg, S. M. *et al.* Explainable machine-learning predictions for the prevention of  
522 hypoxaemia during surgery. *Nature Biomedical Engineering* **2**, 749–760(2018).
  - 523 2. Liang, H. *et al.* Artificial intelligence for stepwise diagnosis and monitoring of covid-19.  
524 *European Radiology* **32**, 2235–2245 (2022).
  - 525 3. Motwani, M. *et al.* Machine learning for prediction of all-cause mortality in patients with  
526 suspected coronary artery disease: a 5-year multicentre prospective registry analysis.

- 527 *European heart journal* **38**, 500–507 (2017).
- 528 4. Hadamitzky, M. *et al.* Optimized prognostic score for coronary computed tomographic an-  
529 giography: results from the confirm registry (coronary ct angiography evaluation for clinical  
530 outcomes: An international multicenter registry). *Journal of the American College of Cardi-*  
531 *ology* **62**, 468–476 (2013).
- 532 5. Chilamkurthy, S. *et al.* Deep learning algorithms for detection of critical findings in head CT  
533 scans: A retrospective study. *The Lancet* **392**, 2388–2396 (2018).
- 534 6. Kermamy, D. S. *et al.* Identifying medical diagnoses and treatable diseases by image-based  
535 deep learning. *Cell* **172**, 1122–1131 (2018).
- 536 7. Nikolov, S. *et al.* Deep learning to achieve clinically applicable segmentation of head and neck  
537 anatomy for radiotherapy. *arXiv preprint arXiv:1809.04430* (2018).
- 538 8. Monteiro, M. *et al.* Multiclass semantic segmentation and quantification of traumatic brain  
539 injury lesions on head ct using deep learning: an algorithm development and multicentre  
540 validation study. *The Lancet Digital Health* (2020).
- 541 9. Campanella, G. *et al.* Clinical-grade computational pathology using weakly supervised deep  
542 learning on whole slide images. *Nature medicine* **25**, 1301–1309 (2019).
- 543 10. Lu, M. Y. *et al.* Data-efficient and weakly supervised computational pathology on whole-slide  
544 images. *Nature Biomedical Engineering* **5**, 555–570 (2021).
- 545 11. Guo, Y. *et al.* Deep learning with weak annotation from diagnosis reports for detection of

- 546 multiple head disorders: a prospective, multicentre study. *The Lancet Digital Health* **4**, e584–  
547 e593 (2022).
- 548 12. He, K., Fan, H., Wu, Y., Xie, S. & Girshick, R. Momentum contrast for unsupervised visual  
549 representation learning. In *2020 IEEE/CVF Conference on Computer Vision and Pattern  
550 Recognition (CVPR)*, 9726–9735 (2020).
- 551 13. He, K. *et al.* Masked autoencoders are scalable vision learners. In *Proceedings of the  
552 IEEE/CVF Conference on Computer Vision and Pattern Recognition*, 16000–16009 (2022).
- 553 14. Lee, H. *et al.* An explainable deep-learning algorithm for the detection of acute intracranial  
554 haemorrhage from small datasets. *Nature Biomedical Engineering* **3**, 173–182 (2019).
- 555 15. Ruff, L. *et al.* Deep one-class classification. In *International conference on machine learning*,  
556 4393–4402 (PMLR, 2018).
- 557 16. Schölkopf, B. *et al.* Support vector method for novelty detection. In *NIPS*, vol. 12, 582–588  
558 (Citeseer, 1999).
- 559 17. Schlegl, T., Seeböck, P., Waldstein, S. M., Schmidt-Erfurth, U. & Langs, G. Unsupervised  
560 anomaly detection with generative adversarial networks to guide marker discovery. In *Inter-  
561 national conference on information processing in medical imaging*, 146–157 (Springer, 2017).
- 562 18. Akcay, S., Atapour-Abarghouei, A. & Breckon, T. P. Ganomaly: Semi-supervised anomaly  
563 detection via adversarial training. In *Asian conference on computer vision*, 622–637 (Springer,  
564 2018).

- 565 19. Abati, D., Porrello, A., Calderara, S. & Cucchiara, R. Latent space autoregression for novelty  
566 detection. In *Proceedings of the IEEE/CVF conference on computer vision and pattern*  
567 *recognition*, 481–490 (2019).
- 568 20. Tian, Y. *et al.* Weakly-supervised video anomaly detection with robust temporal feature  
569 magnitude learning. In *Proceedings of the IEEE/CVF International Conference on Computer*  
570 *Vision*, 4975–4986 (2021).
- 571 21. Liznerski, P. *et al.* Explainable deep one-class classification. *arXiv preprint arXiv:2007.01760*  
572 (2020).
- 573 22. Fan, Y. *et al.* Video anomaly detection and localization via gaussian mixture fully convo-  
574 lutional variational autoencoder. *Computer Vision and Image Understanding* **195**, 102920  
575 (2020).
- 576 23. Yao, Q., Xiao, L., Liu, P. & Zhou, S. K. Label-free segmentation of covid-19 lesions in lung  
577 ct. *IEEE transactions on medical imaging* **40**, 2808–2819 (2021).
- 578 24. Baur, C., Graf, R., Wiestler, B., Albarqouni, S. & Navab, N. Steganomaly: Inhibiting cyclegan  
579 steganography for unsupervised anomaly detection in brain mri. In *International conference*  
580 *on medical image computing and computer-assisted intervention*, 718–727 (Springer, 2020).
- 581 25. Stepec, D. & Skocaj, D. Unsupervised detection of cancerous regions in histology imagery  
582 using image-to-image translation. In *Proceedings of the IEEE/CVF Conference on Computer*  
583 *Vision and Pattern Recognition*, 3785–3792 (2021).

- 584 26. Baur, C., Wiestler, B., Albarqouni, S. & Navab, N. Deep autoencoding models for  
585 unsupervised anomaly segmentation in brain mr images. In *Brainlesion: Glioma, Multiple*  
586 *Sclerosis, Stroke and Traumatic Brain Injuries: 4th International Workshop, BrainLes 2018,*  
587 *Held in Conjunction with MICCAI 2018, Granada, Spain, September 16, 2018, Revised*  
588 *Selected Pa-pers, Part I 4*, 161–169 (Springer, 2019).
- 589 27. Akcay, S., Atapour-Abarghouei, A. & Breckon, T. P. Ganomaly: Semi-supervised anomaly  
590 detection via adversarial training. In *Computer Vision–ACCV 2018: 14th Asian Conference on*  
591 *Computer Vision, Perth, Australia, December 2–6, 2018, Revised Selected Papers, Part III 14*,  
592 622–637 (Springer, 2019).
- 593 28. Isola, P., Zhu, J.-Y., Zhou, T. & Efros, A. A. Image-to-image translation with conditional  
594 adversarial networks. In *Proceedings of the IEEE conference on computer vision and pattern*  
595 *recognition*, 1125–1134 (2017).
- 596 29. Zhu, J.-Y., Park, T., Isola, P. & Efros, A. A. Unpaired image-to-image translation using cycle-  
597 consistent adversarial networks. In *Proceedings of the IEEE international conference on com-*  
598 *puter vision*, 2223–2232 (2017).
- 599 30. Ding, L. & Goshtasby, A. On the canny edge detector. *Pattern Recognition* **34**, 721–725  
600 (2001).
- 601 31. Nazeri, K., Ng, E., Joseph, T., Qureshi, F. Z. & Ebrahimi, M. Edgeconnect: Generative image  
602 inpainting with adversarial edge learning. *arXiv preprint arXiv:1901.00212* (2019).



- 603 32. Deng, J. *et al.* ImageNet: A large-scale hierarchical image database. In *Proc. of the 22nd*  
604 *IEEE Conference on Computer Vision and Pattern Recognition*, 248–255 (IEEE, 2009).
- 605 33. Tax, D. M. & Duin, R. P. Support vector data description. *Machine learning* **54**, 45–66 (2004).  
606
- 607 34. He, K., Fan, H., Wu, Y., Xie, S. & Girshick, R. Momentum contrast for unsupervised visual  
608 representation learning. *arXiv preprint arXiv:1911.05722* (2019).
- 609 35. Kux, L. *Clinical and Patient Decision Support Software; Draft Guidance for Industry and*  
610 *Food and Drug Administration Staff* (US FDA, 2017).
- 611 36. Muelly, M. C. & Peng, L. Spotting brain bleeding after sparse training. *Nature Biomedical*  
612 *Engineering* **3**, 161 (2019).

## List of Tables

|   |                                                                                                    |           |
|---|----------------------------------------------------------------------------------------------------|-----------|
| 1 | <b>Table 1. Performance for disorder types across different lesion sizes.....</b>                  | <b>9</b>  |
| 2 | <b>Table 2. Performance for disorder types based on urgency of treatment.....</b>                  | <b>9</b>  |
| 3 | <b>Table 3. Performance on the pulmonary CT test dataset for pulmonary disorder detection.....</b> | <b>17</b> |
| 4 | <b>Table 4. Performance on the retinal OCT test dataset for retinal disorder detection.....</b>    | <b>17</b> |

## List of Figures

|   |                                                                                                                   |           |
|---|-------------------------------------------------------------------------------------------------------------------|-----------|
| 1 | <b>Figure 1. ROC curves for disorder types across different lesion sizes. ....</b>                                | <b>10</b> |
| 2 | <b>Figure 2. ROC curves for disorder types based on urgency of treatment. ....</b>                                | <b>10</b> |
| 3 | <b>Figure 3. Visualization examples for head disorder detection. ....</b>                                         | <b>12</b> |
| 4 | <b>Figure 4. The performance of four radiologists before and after considering the system recommendation.....</b> | <b>13</b> |
| 5 | <b>Figure 5. Patterns of disorder distribution in CT scans.....</b>                                               | <b>14</b> |

|   |                                                                                                                                         |           |
|---|-----------------------------------------------------------------------------------------------------------------------------------------|-----------|
| 6 | <b>Figure 6. Iterative performance improvement by de-disorder network (DeDN) and disorder recognition network (DRN).....</b>            | <b>15</b> |
| 7 | <b>Figure 7. Examples of our system on the CT-based pulmonary disorder detection and the OCT-based retinal disorder detection. ....</b> | <b>19</b> |
| 8 | <b>Figure 8. The process of constructing the datasets. ....</b>                                                                         | <b>27</b> |
| 9 | <b>Figure 9. The overview of ISL, a learning algorithm for developing broad-spectrum disorder detection systems. ....</b>               | <b>29</b> |

## **Acknowledgements**

We thank the radiologists from the PLAGH for their efforts in labeling the test data. We thank National Key R&D Program of China (2020AAA0105500 to Y.G., G.D., and Q.D., 2018YFA0704000 to F.X.), and National Natural Science Foundation of China (U21B2013 to Y.G., 62021002 to F.X., 81825012 to X.L., 81730048 to X.L., 82271952 to J.L.) for supporting this study.

## **Author's contributions**

X.L., Q.D., F.X., Y.H. and Y.G. designed the research; X.L., J.L., Y.H., W.Z. and H.L. collected the data; Y.H., Y.G., L.M., J.L., X.L. and F.X. verified the raw underlying data, which had been accessed by all authors; Y.H., Y.G., L.M. and H.T. developed the system; Y.H., Y.G., L.M., G.D., J.L., H.L. and J.H. analyzed the results; Y.H., L.M. and J.L. co-wrote the manuscript; S.L., H.Q., F.X. and Y.G. critically revised the manuscript; and all the authors discussed the results and provided feedback regarding the manuscript.

## **Competing interests**

The authors declare no competing interests.
